# Supplementary material for: Clinical Utility of Patient-Derived Cell-Based In Vitro Drug Sensitivity Testing for Optimizing Adjuvant Therapy in Dogs with Solid Tumors: A Retrospective Study (2019–2023)
Source: MDPI journal article supplement (doi:10.3390/ani15081146), 2025-04-16
Supplement: s1 [file animals-3530077-supplementary.pdf › animals-3530077-supplementary.pdf]

## Supplementary Material

**Table S1.** In vitro drug sensitivity testing results

| Case no. | Dose-response curve                                                                 | Selected drugs | Case no. | Dose-response curve                                                                   | Selected drugs |
|----------|-------------------------------------------------------------------------------------|----------------|----------|---------------------------------------------------------------------------------------|----------------|
| 1        | 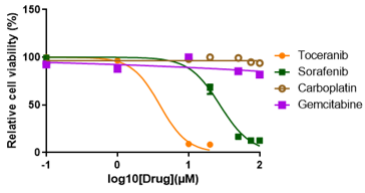   | Toceranib      | 6        |    | Toceranib      |
| 2        |    | Toceranib      | 7        |    | Toceranib      |
| 3        |    | Toceranib      | 8        |    | Toceranib      |
| 4        |  | Toceranib      | 9        |  | Toceranib      |
| 5        |  | Toceranib      | 10       |  | Doxorubicin    |
| Case no. | Dose-response curve                                                                 | Selected drugs | Case no. | Dose-response curve                                                                   | Selected drugs |

11

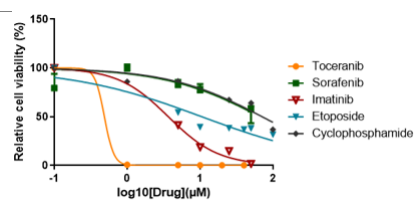

Toceranib

14

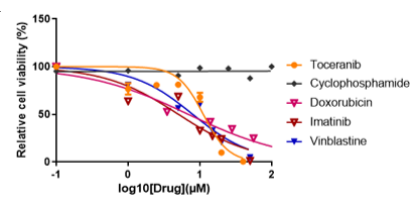

Imatinib

12

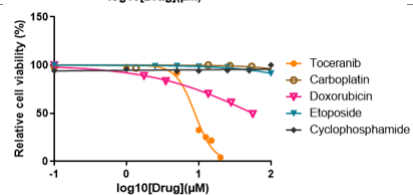

Doxorubicin

15

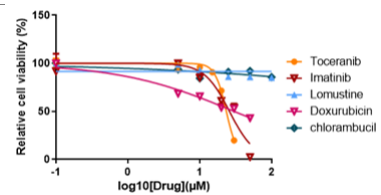

Toceranib

13

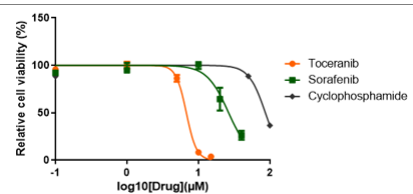

Toceranib

16

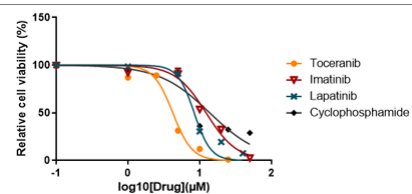

Toceranib

**Table S2.** Adverse events observed in dogs treated with TKIs and conventional chemotherapy

| Category         | Targeted therapy (n=26) |         |         |         |         | Conventional chemotherapy (n=7) |         |         |         |         |
|------------------|-------------------------|---------|---------|---------|---------|---------------------------------|---------|---------|---------|---------|
|                  | Grade 1                 | Grade 2 | Grade 3 | Grade 4 | Grade 5 | Grade 1                         | Grade 2 | Grade 3 | Grade 4 | Grade 5 |
| Constitutional   |                         |         |         |         |         |                                 |         |         |         |         |
| Lethargy         | 5                       |         |         |         |         | 5                               |         |         |         |         |
| Gastrointestinal |                         |         |         |         |         |                                 |         |         |         |         |
| Inappetence      | 5                       | 2       |         |         |         | 3                               | 1       |         |         |         |
| Anorexia         |                         |         |         |         |         |                                 | 1       | 1       |         |         |
| Vomiting         | 1                       | 1       |         |         |         | 1                               | 1       | 1       |         |         |
| Diarrhea         | 2                       | 3       |         |         |         |                                 | 3       | 1       |         |         |
| Hematologic      |                         |         |         |         |         |                                 |         |         |         |         |
| Anemia           |                         |         |         |         |         | 1                               |         |         |         |         |
| Neutropenia      | 6                       | 1       |         |         |         | 1                               |         | 1       |         |         |
| Thrombocytopenia |                         |         |         |         |         |                                 |         |         |         |         |
| Biochemical      |                         |         |         |         |         |                                 |         |         |         |         |
| Increased ALT    | 2                       |         |         |         |         | 1                               |         |         |         |         |
| Increased AST    | 4                       |         |         |         |         |                                 |         |         |         |         |
| Increased ALP    | 1                       |         |         |         |         |                                 |         |         | 1       |         |
| Renal            |                         |         |         |         |         |                                 |         |         |         |         |
| Proteinuria      |                         |         | 1       |         |         |                                 |         |         |         |         |
| Cardiovascular   |                         |         |         |         |         |                                 |         |         |         |         |
| Hypertension     | 1                       |         |         |         |         |                                 |         |         |         |         |
| Total            | 27                      | 7       | 1       | 0       | 0       | 12                              | 6       | 4       | 1       | 0       |

*Note:* Adverse events were evaluated according to the Veterinary Cooperative Oncology Group-Common Terminology Criteria for Adverse Events (VCOG-CTCAE v2.0).

Abbreviation: ALT, alanine aminotransferase; AST, aspartate aminotransferase; ALP, alkaline phosphatase.
